# Supplementary material for: Rapid implementation of an outpatient arthroplasty care pathway: a COVID-19-driven quality improvement initiative
Source: PubMed Central journal article supplement — BMJ Open Qual. 2022 Mar 21;11(1):e001698. doi: 10.1136/bmjoq-2021-001698 (PMC8943481; doi:10.1136/bmjoq-2021-001698), 2022-03-21
Supplement: bmjoq-2021-001698supp001.pdf [file bmjoq-2021-001698supp001.pdf]

## **Appendix A: Same-day Outpatient total joint arthroplasty review criteria**

### **High risk conditions –not appropriate for same-day**

#### **Medical**

- Bleeding disorder
- Liver cirrhosis
- Renal disease > stage 2 (Estimated glomerular filtration rate <89)

#### **Social**

- Inability to participate in preoperative counselling (i.e., lack of mental capacity, lack of means of transportation)
- Lack of social support system (help in the home post-operatively)

### **Moderate risk conditions**

**If 2 or more, please consult with anesthesia to book for day case**

#### **Medical**

- Age > 80 years
- American Society of Anesthesia classification (ASA) > 3
- Significant or untreated obstructive sleep apnea
- Current, or history of significant cardiac disease
- Poor controlled diabetes mellitus
- Body mass index > 40
- Complex joint surgery
- Chronic pain patient/chronic opioid use
- Alcohol abuse

#### **Social**

- Inability to have support x minimum 4 days post-op

### **Ideal same-day candidates**

#### **Medical**

- ASA 1,2
- Minimal or well-controlled comorbidities
- Good baseline physical fitness
- Non-complex primary joint
- Body mass index <40
- No chronic opioid use
- Minimal to no alcohol/cannabis use
- No illicit drug use

#### **Social**

- Support at home  $\geq$  4 days post-op

Modified from CMAJ 2020 January 13;192:E34-9. doi: 10.1503/cmaj.190182
