# Supplementary material for: Rapid implementation of an outpatient arthroplasty care pathway: a COVID-19-driven quality improvement initiative
Source: PubMed Central journal article supplement — BMJ Open Qual. 2022 Mar 21;11(1):e001698. doi: 10.1136/bmjoq-2021-001698 (PMC8943481; doi:10.1136/bmjoq-2021-001698), 2022-03-21
Supplement: bmjoq-2021-001698supp002.pdf [file bmjoq-2021-001698supp002.pdf]

**Appendix B: Perioperative management – Total Joint Arthroplasty**

|      | Spinal                                                               | Blocks (ropivacaine with epinephrine)                                                                                                                                                                                                                     |                                                                                                                                                                                                                 |
|------|----------------------------------------------------------------------|-----------------------------------------------------------------------------------------------------------------------------------------------------------------------------------------------------------------------------------------------------------|-----------------------------------------------------------------------------------------------------------------------------------------------------------------------------------------------------------------|
| Hip  | Mepivacaine 2% x 3 - 3.2mL<br><br><b>Avoid intrathecal morphine</b>  | Pericapsular Nerve Group Block<br>Ropivacaine 0.5% x 15mL<br><br>Local Infiltration by surgeon up to a maximum cumulative dose of Ropivacaine 3mg/kg                                                                                                      | Preoperative acetaminophen, celecoxib<br><br>Ensure fluid resuscitated (high risk of hypovolemia in these patients)<br><br>Contact Physiotherapy to coordinate assessment (surgeons and PACU RNs to coordinate) |
| Knee | Mepivacaine 2% x 2.5 -2.8mL<br><br><b>Avoid intrathecal morphine</b> | Adductor Canal nerve block<br>Ropivacaine 0.5% x 15-20mL<br><br>Injection between Popliteal Artery and Capsule of the Knee (iPACK)<br>Ropivacaine 0.25% x 20mL<br><br>Local Infiltration by surgeon up to a maximum cumulative dose of Ropivacaine 3mg/kg | Preoperative acetaminophen, celecoxib<br><br>Contact Physiotherapy to coordinate assessment (surgeons and PACU RNs to coordinate)                                                                               |

\*General anesthetists are acceptable for same-day patients with difficult spinals

\*Be cautious with spinal doses and ensure **NO** intrathecal morphine is administered
