# Supplementary material for: Rapid implementation of an outpatient arthroplasty care pathway: a COVID-19-driven quality improvement initiative
Source: PubMed Central journal article supplement — BMJ Open Qual. 2022 Mar 21;11(1):e001698. doi: 10.1136/bmjoq-2021-001698 (PMC8943481; doi:10.1136/bmjoq-2021-001698), 2022-03-21
Supplement: bmjoq-2021-001698supp003.pdf [file bmjoq-2021-001698supp003.pdf]

1 **Appendix C:**

Small Scale Testing Follow-up Testing & Implementation Hardwiring Change

| PDSA CYCLE   | #1 Pilot Cases and Outpatient Pathway Development<br>09/2020 – 12/2020                                                                                                      | #2 Pathway Implementation<br>01/2021 – 2/2021                                                                                                                                      | #3 Revisiting Failed Discharges<br>03/2021 – 4/2021                                                                                                                          | #4 Further Optimization & Hardwiring Outpatient Pathway<br>05/2021 – 6/2021                                                                                                                         |
|--------------|-----------------------------------------------------------------------------------------------------------------------------------------------------------------------------|------------------------------------------------------------------------------------------------------------------------------------------------------------------------------------|------------------------------------------------------------------------------------------------------------------------------------------------------------------------------|-----------------------------------------------------------------------------------------------------------------------------------------------------------------------------------------------------|
| <b>Plan</b>  | <ul style="list-style-type: none"> <li>Process mapping of inpatient pathway</li> <li>Pilot outpatient cases</li> </ul>                                                      | <ul style="list-style-type: none"> <li>Formal launch of outpatient pathway 01/2021</li> <li>2 to 6 cases scheduled per week</li> </ul>                                             | <ul style="list-style-type: none"> <li>Continue implementation of hybrid pathway</li> </ul>                                                                                  | <ul style="list-style-type: none"> <li>Ramp up of outpatient arthroplasty</li> <li>Add preemptive opioid analgesia prior to spinal wearing off in PACU</li> </ul>                                   |
| <b>Do</b>    | <ul style="list-style-type: none"> <li>12 pilot cases attempted, 11 discharged home from PACU</li> </ul>                                                                    | <ul style="list-style-type: none"> <li>35 cases attempted (28 successful)</li> <li>Coincided with 2<sup>nd</sup> COVID-19 wave</li> </ul>                                          | <ul style="list-style-type: none"> <li>9 cases attempted (6 successful)</li> <li>Suspension of all elective surgeries 04/2021 due to 3<sup>rd</sup> COVID-19 wave</li> </ul> | <ul style="list-style-type: none"> <li>22 cases attempted (21 successful)</li> </ul>                                                                                                                |
| <b>Study</b> | <ul style="list-style-type: none"> <li>Ambiguity re who is a suitable outpatient candidate</li> <li>Need to streamline PACU PT consults</li> <li>Patient anxiety</li> </ul> | <ul style="list-style-type: none"> <li>Significant impact on inpatient resource savings due to new pathway</li> <li>Pain still a barrier to discharge for some patients</li> </ul> | <ul style="list-style-type: none"> <li>Limited feedback due to drop in case output</li> </ul>                                                                                | <ul style="list-style-type: none"> <li>Significant improvement in analgesia</li> <li>56% of knee arthroplasty did not require opioids during first 72 hours</li> </ul>                              |
| <b>Act</b>   | <ul style="list-style-type: none"> <li>Develop standardized patient selection criteria</li> <li>Develop patient education materials</li> <li>Evening shift PT</li> </ul>    | <ul style="list-style-type: none"> <li>Add outpatient continuous nerve block infusion for knee arthroplasty</li> </ul>                                                             | <ul style="list-style-type: none"> <li>Prepare for surgical ramp up once elective surgeries resume</li> </ul>                                                                | <ul style="list-style-type: none"> <li>Continue reviewing failed discharges</li> <li>Formalize outpatient pathway as an important tool to address ongoing inpatient resource constraints</li> </ul> |

PACU:post-anesthesia care unit, PT: physiotherapy

2  
3
